# Supplementary material
Source: Elsevier journal article supplement (https://www.sciencedirect.com/science/article/pii/S0120789X16000034)
Supplement: mmc1 [file S0120789X16000034:mmc1.pdf]

## DIARIO MICCIONAL. Instrucciones para completarlo.

El Diario Miccional registra adecuadamente sus síntomas y permite valorar a su médico y a usted la severidad de los síntomas y hacer un diagnóstico diferencial con otras enfermedades. Debe completarlo durante 3 días lo mejor que pueda hacerlo. (1 día en cada hoja), anotando:

- **HORA:** ponga la hora a la que orina o tiene una pérdida de orina (incluida toda la noche). Cada día empieza a partir de la hora que usted se levanta de su cama.
- **VOLUMEN ORINADO:** registre la cantidad que orina, en mililitros (ml) o centímetros cúbicos (cc), medida con un vaso medidor.
- **URGENCIA** marque cuando sienta un deseo fuerte y repentino de orinar, que siente que no puede aguantar usando la siguiente escala para clasificarla:

Clasificación de la urgencia en **grados de 0 a 4:**

|   |                            |                                                                                         |
|---|----------------------------|-----------------------------------------------------------------------------------------|
| 0 | No hay Urgencia            | No siento un deseo repentino de orinar, que no puedo aplazar.                           |
| 1 | Leve urgencia              | Tengo ganas de orinar, pero puedo esperar el tiempo necesario sin miedo a mojarme       |
| 2 | Urgencia moderada          | Puedo esperar para orinar por un rato, sin miedo a mojarme                              |
| 3 | Urgencia severa            | No puedo esperar ir a orinar, debo ir rápido al baño para no tener una pérdida de orina |
| 4 | Incontinencia por urgencia | Se me escapa la orina antes de llegar al baño.                                          |

- **ESCAPE DE ORINA** (PÉRDIDA INVOLUNTARIA, INCONTINENCIA) y tipo: indique si tiene escapes o pérdidas accidentales de orina, y si los escapes son:

**Incontinencia de urgencia:** el escape de orina se produce por un deseo fuerte y repentino de orinar.

**Incontinencia de esfuerzo:** pérdida de orina causado por cualquier esfuerzo (tos, estornudar, alzar peso) ejercicio (saltar, caminar) o movimiento (levantarse) y por lo general no se acompaña de urgencia.

- **CAMBIO DE ROPA INTERIOR O PAÑAL:** apunte si se cambia ropa interior, pañal o protector por pérdida de orina
- **BEBIDA:** apunte la cantidad de líquido de cualquier tipo que tome (ml o cc)
- **NO OLVIDE PONER LA HORA A LA QUE SE ACUESTA Y A LA QUE SE LEVANTA**

A continuación le ponemos un **EJEMPLO** de cómo completar el diario:

Hora a la que se levanta de la cama **\_7:00\_** Hora a la que se acuesta **\_22:30\_**

| HORA  | VOLUMEN orinado<br>(ml o cc) | URGENCIA<br>su grado (0-4) | ESCAPE DE ORINA<br>y tipo: por urgencia<br>o por esfuerzos | CAMBIO DE ROPA<br>pañal, protector | BEBIDA<br>(ml o cc) |
|-------|------------------------------|----------------------------|------------------------------------------------------------|------------------------------------|---------------------|
| 8:20  | 250 ml                       | 2                          | NO                                                         | Toalla higiénica                   | 300                 |
| 10:30 | 200 ml                       | 0                          | NO                                                         | NO                                 |                     |
| 12:45 |                              |                            |                                                            |                                    | 250                 |
| 15:30 | 150 ml                       | 4                          | SI con urgencia                                            | Ropa interior                      |                     |
| 18:30 |                              |                            |                                                            |                                    | 300                 |
| 20:30 | 300 ml                       | 2                          | NO                                                         | NO                                 |                     |
| 21    |                              |                            |                                                            |                                    | 200                 |
| 22    |                              |                            | SI con esfuerzo                                            | Pañal                              |                     |
| 22:15 | 200 ml                       | 3                          | NO                                                         |                                    | 225                 |
| 3:00  | 175                          | 4                          | SI con urgencia                                            | Ropa interior                      |                     |
| 6:15  | 200                          | 3                          | NO                                                         | NO                                 |                     |

**Fecha:** \_\_/\_\_/\_\_

Hora a la que se levanta de la cama\_\_\_\_\_
 Hora a la que se acuesta\_\_\_\_\_

[illegible]

## Diario miccional: **DÍA 2**

**Fecha:** \_\_/\_\_/\_\_

Nombre \_\_\_\_\_ Apellidos \_\_\_\_\_

Hora a la que se levanta de la cama \_\_\_\_\_ Hora a la que se acuesta \_\_\_\_\_

[illegible]

**DIARIO MICCIONAL** (3 días – periodos de 24 horas)

## Hoja De Evaluación Del Diario Miccional: Resultados/24h (A COMPLETAR POR EL MÉDICO)

Nombre \_\_\_\_\_ Apellidos \_\_\_\_\_

| DIARIO                   | MICCIONAL                | DIA 1 | DIA 2 | DIA3 | MEDIA |
|--------------------------|--------------------------|-------|-------|------|-------|
| Frecuencia Miccional     | FMD (episodios/día)      |       |       |      |       |
|                          | FMN (episodios/día)      |       |       |      |       |
|                          | FM/24h (episodios/día)   |       |       |      |       |
| Volumen Miccional        | VMmáx Diurno (ml)        |       |       |      |       |
|                          | VMmáx Nocturno (ml)      |       |       |      |       |
|                          | VMmed (ml)               |       |       |      |       |
| Urgencia nº y grado máx. | Urgencia (episodios/día) |       |       |      |       |
|                          | Urgencia grado           |       |       |      |       |
| Incontinencia            | IUU (episodios/día)      |       |       |      |       |
|                          | IUE (episodios/día)      |       |       |      |       |
|                          | Mudas (nº/día)           |       |       |      |       |
|                          | Ingesta 24h (ml)         |       |       |      |       |
| Diuresis                 | Diuresis 24h (ml)        |       |       |      |       |
|                          | Diuresis nocturna (ml)   |       |       |      |       |

### Claves del resumen del diario

|                                                   |                                                    |
|---------------------------------------------------|----------------------------------------------------|
| FMD: frecuencia miccional diurna                  | IUU: nº de episodios de incontinencia de urgencia  |
| FMN: frecuencia miccional nocturna                | IUE: nº de episodios de incontinencia de esfuerzo  |
| FM/24h: frecuencia miccional en 24 h              | Mudas = Cambios de ropa interior/ pañal/ protector |
| VMmáx Diurno: Volumen miccional máximo diurno     | Ingesta 24h: Ingesta de líquidos en 24 horas       |
| VMmáx Nocturno: Volumen miccional máximo nocturno | Diuresis 24h: volumen de diuresis en 24 horas      |
| VMmed: Volumen miccional medio                    | Diuresis nocturna: volumen de diuresis en la noche |
| Urgencia: nº de episodios de urgencia             |                                                    |
| Urgencia grado: grado de urgencia (de 0 a 4)      |                                                    |

**Autor: MA Jiménez Cidre©. Urólogo**
